# Supplementary material
Source: publisher figshare collection journal article supplement (https://karger.figshare.com/ndownloader/files/28660254)
Supplement: Supplementary file 1 [file 28660254]

**Supplementary Table 1. The distribution of various factors between primary HCC and control groups**

| Factor | HCC cases (n=300) | Hospital controls (n=612) | *t*/*2* | *p* |
| --- | --- | --- | --- | --- |
| Age (y) | 50.46 ±8.86 | 51.09 ±7.68 | 1.105 | 0.269 |
| Gender (%) |  | | | |
| Male | 198 (66.00) | 468 (76.47) | 10.679 | 0.001 |
| Female | 102 (34.00) | 144 (23.53) |
| Body mass index (kg/m2) | 23.12 ±3.13 | 23.16 ±3.07 | 0.183 | 0.854 |
| HBsAg (%) |  | | | |
| Positive | 81 (27.00) | 114 (18.63) | 7.905 | 0.005 |
| Negative | 219 (73.00) | 498 (81.37) |
| Anti-HCV (%) |  | | | |
| Positive | 136 (45.33) | 215 (35.13) | 8.426 | 0.004 |
| Negative | 164 (54.67) | 397 (64.87) |
| Alcohol drinker (%) |  | | | |
| Yes | 140 (46.67) | 306 (50.00) | 0.767 | 0.381 |
| No | 160 (53.33) | 306 (50.00) |
| Smoker (%) |  | | | |
| Yes | 180 (60.00) | 192 (31.37) | 67.131 | 0.000 |
| No | 120 (40.00) | 420 (68.63) |
